# Supplementary material for: Enhanced Electrochemical Performance of Battery-Type Zn-Doped MoO₃ Nanoflakes for Hybrid Supercapacitor Applications
Source: Research Square preprint supplement (doi:10.21203/rs.3.rs-7701029/v1), 2025-10-08
Supplement: Supplementary file 1 [file d2a28fd11ea50066ac53985f.docx]

**Supporting Information**

**Enhanced Electrochemical Performance of Battery-Type Zn-Doped MoO₃ Nanoflakes for Hybrid Supercapacitor Applications**

Purusottam Reddy Ba, Mohamed A. Ghanemb, Boseong Sona, Huijin Kima, Meenakshamma Ambapuram c, Ramanadha Mangirid*, Si-Hyun Parka*

*aDepartment of Electronic Engineering, Yeungnam University, 280 Daehak-ro, Gyeongsan-si, Gyeongsanbuk-do, South Korea.*

*b Department of Chemistry, College of Science, King Saud University, P.O. Box 2455, Riyadh 11451, Saudi Arabia cDepartment of Humanities and Sciences, KSRM College of Engineering, Kadapa-518003, Andhra Pradesh, India.*

*dDepartment of Physics and Semiconductior Science, Gachon University, 1342 Seongnamdaero, Sujeong-gu, Seongnam-si, Gyeonggi-do, 461-701, South Korea*

*Email: [sihyun_park@yu.ac.kr](mailto:sihyun_park@yu.ac.kr) (Si-Hyun Park), [ramanadh01@gmail.com](mailto:ramanadh01@gmail.com) (Ramanadha Mangiri)

**Supporting Information**

**Figure S1:(**a) Energy-dispersive X-ray spectroscopy (EDS) spectrum of MO, (b-d) elemental mapping of Mo, O for MO material.

.


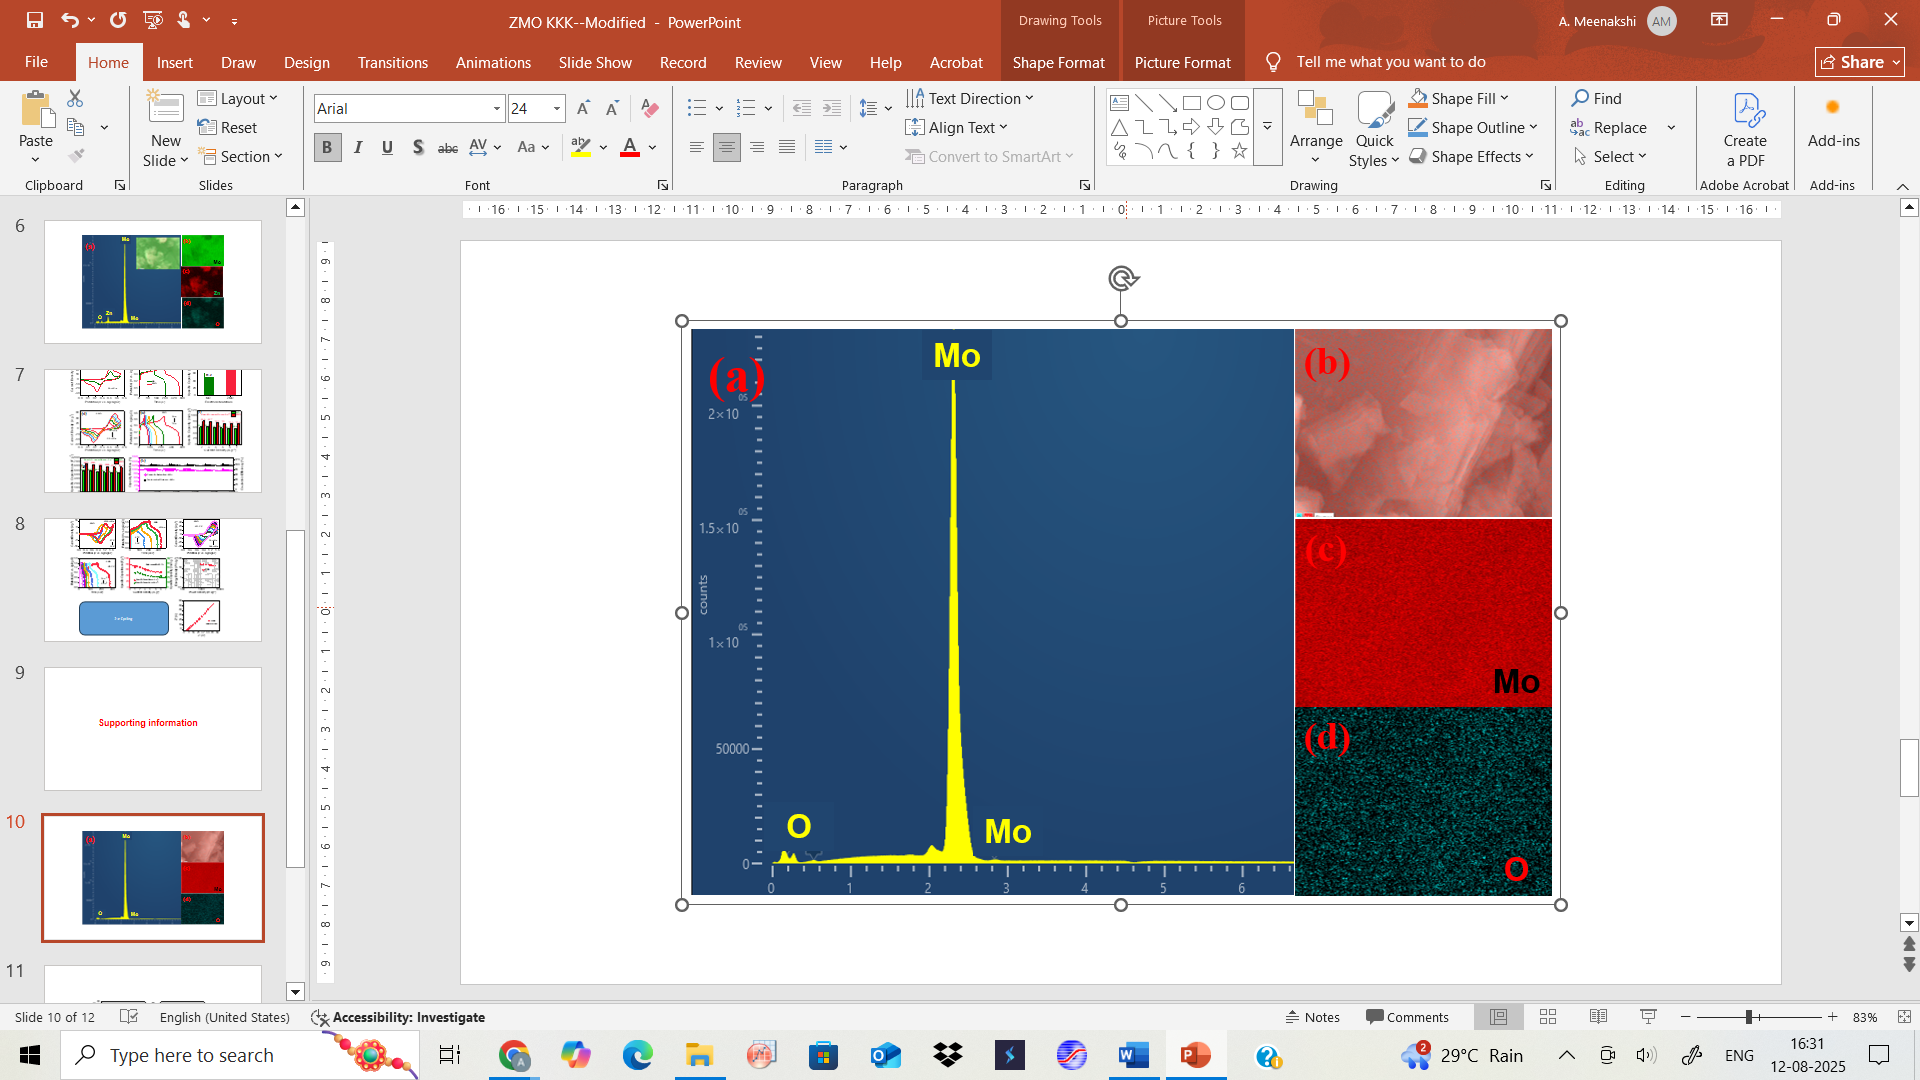


**Figure S2:** CV curves of the MO electrode at 10 to 60 mV/s (e) GCD profiles of the MO electrode at different current densities.

.


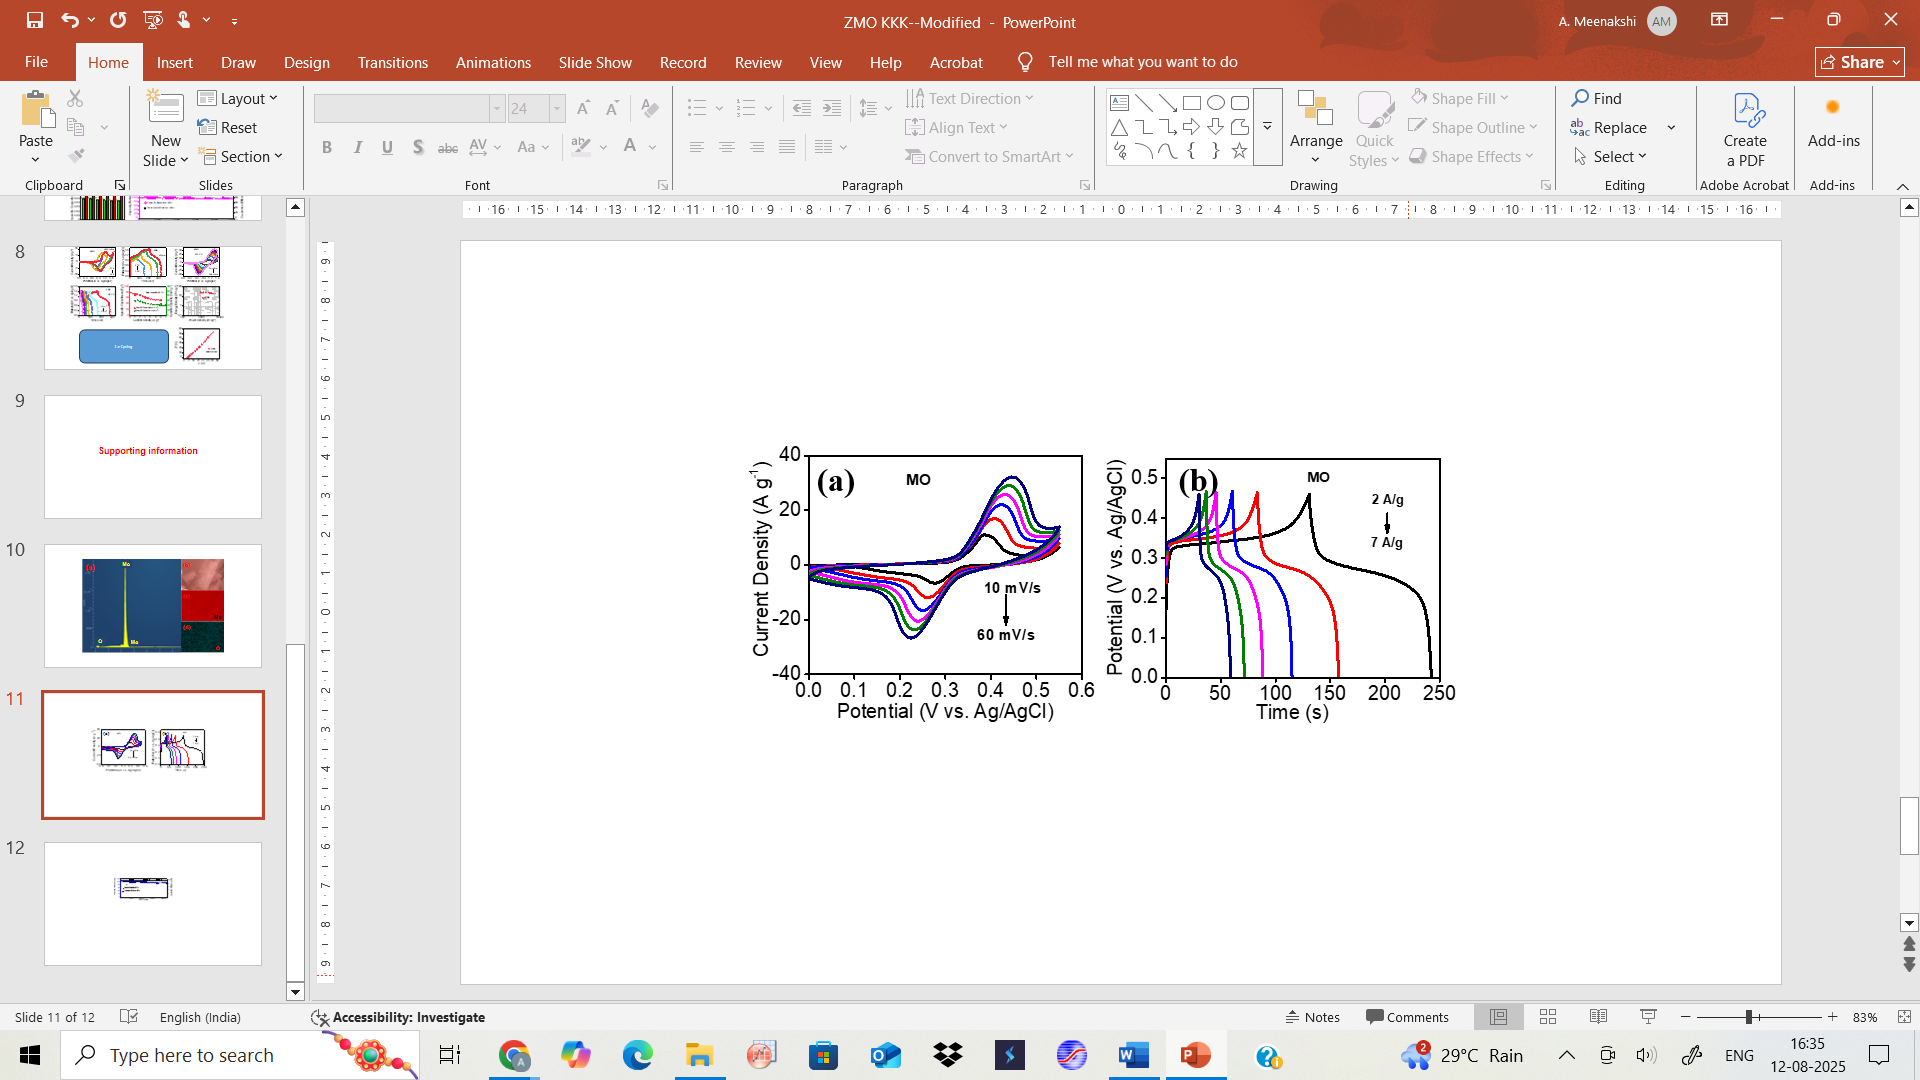


**Table S1.** Comparative Ed, Pd, and cycling stability of the fabricated Zn-MO//AC HSC with the reported works.

.

| **Sample** | **Electrolyte** | **Ed (Wh kg-1)** | **Pd**  **(W kg-1)** | **stability** | **Ref.** |
| --- | --- | --- | --- | --- | --- |
| CoMoFN-90//CoMoFN-90 | 3 M KOH | 6.44 | 700 | 6500 cycles @ 73% at 1 A g-1 | [1] |
| MoO3/PPy/rGO//MoO3/PPy/rGO | 1 mol L-1 Na2SO4 | 19.8 | 301 | 6000 cycles @ 86.2% at 2 A g-1 | [2] |
| N-rGO/ZnCo2O4 | 1 M KOH | 21 | 1500 | 5000 cycles @ 89.6% | [3] |
| ZnCo2O4@ZnWO4//AC | 3 M KOH | 24 | 400 | 5000 cycles @ 98.5% at 100 mA cm-2 | [4] |
| ZnCo2O4//AC ASC | 2 M KOH | 21.2 | 800 | 10000 cycles @ 100% at 5 A g-1 | [5] |
| PANI-ZnCo2O4//AC HSC | 2 M KOH | 13.25 | 375 | 3000 cycles @ 90% | [6] |
| ZnCo2O4-UTCS//AC ASC | 2 M KOH | 20.31 | 855 | 5000 cycles @ 87% at 5 A g-1 | [7] |
| **Zn-MO//AC HSC** | **1 M KOH** | **25.65** | **5120** | **30000 cycles @ 81% at 30 mA cm-2** | **This work** |

**References**

[1] Hsiao Y-C, Yu H-Y, Lee P-Y, Yougbaré S, Lin L-Y, Wu Y-F (2022) Facile synthesis of ammonium-decorated cobalt molybdenum fluoride as electroactive material of supercapacitor. Journal of Energy Storage 56:106055.

[2] Deng H, Huang J, Hu Z, Chen X, Huang D, Jin T (2021) Fabrication of a Three-Dimensionally Networked MoO3/PPy/rGO Composite for a High-Performance Symmetric Supercapacitor. ACS Omega 6:9426-9432.

[3] Vignesh G, Ranjithkumar R, Devendran P, Nallamuthu N, Sudhahar S, Krishna Kumar M (2023) Nitrogen doped reduced graphene oxide/ZnCo2O4 nanocomposite electrode for hybrid supercapacitor application. Materials Science and Engineering: B 290:116328.

[4] Xie L, Liu Y, Bai H, Li C, Mao B, Sun L, Shi W (2018) Core-shell structured ZnCo2O4@ZnWO4 nanowire arrays on nickel foam for advanced asymmetric supercapacitors. Journal of Colloid and Interface Science 531:64-73.

[5] Eum J-H, Mandal D, Kim H (2021) A novel synthesis of 2D porous ZnCo2O4 nanoflakes using deep eutectic solvent for high-performance asymmetric supercapacitors. Journal of Electroanalytical Chemistry 892:115299.

[6] Omar FS, Numan A, Duraisamy N, Bashir S, Ramesh K, Ramesh S (2017) A promising binary nanocomposite of zinc cobaltite intercalated with polyaniline for supercapacitor and hydrazine sensor. Journal of Alloys and Compounds 716:96-105.

[7] zhou Y, Chen L, Jiao Y, Li Z, Gao Y (2019) Controllable fabrication of ZnCo2O4 ultra-thin curved sheets on Ni foam for high-performance asymmetric supercapacitors. Electrochimica Acta 299:388-394.
